# Supplementary material for: MHC II+ resident peritoneal and pleural macrophages rely on IRF4 for development from circulating monocytes
Source: PubMed Central journal article supplement — J Exp Med. 2016 Sep 19;213(10):1951–9. doi: 10.1084/jem.20160486 (PMC5030807; doi:10.1084/jem.20160486), 2016-09-19
Supplement: JEM_20160486_TableS1.pdf [file JEM_20160486_TableS1.pdf]

Supplemental Table 1. List of mRNA transcripts elevated in MHC II+ F4/80low small peritoneal macrophages relative to the F4/80hi large peritoneal macrophages, red pulp splenic macrophages, lung macrophages, or microglia

| ProbeSet ID | Gene Symbol | MF.II+480 lo.PC#1 | MF.II+480 lo.PC#2 | MF.II+480 lo.PC#3 | MF.II-480hi.PC# 1 | MF.II-480hi.PC# 2 | MF.II-480hi.PC# 3 | MF.RP.Sp# 1 | MF.RP.Sp# 2 | MF.RP.Sp# 3 | MF.Lu#1 | MF.Lu#2 | MF.Lu#3 | MF.Microgl ia.CNS#1 | MF.Microgl ia.CNS#2 | MF.Microgl ia.CNS#3 | TTEST      | FOLD  |
|-------------|-------------|-------------------|-------------------|-------------------|-------------------|-------------------|-------------------|-------------|-------------|-------------|---------|---------|---------|---------------------|---------------------|---------------------|------------|-------|
| 10590631    | Ccr2        | 4466              | 4238              | 4405              | 48                | 43                | 47                | 38          | 31          | 38          | 53      | 49      | 49      | 33                  | 50                  | 49                  | 3.566E-22  | 99.26 |
| 10457168    | Cd226       | 1226              | 1080              | 1109              | 18                | 19                | 21                | 24          | 18          | 19          | 23      | 17      | 17      | 26                  | 22                  | 29                  | 5.7343E-17 | 53.83 |
| 10538791    | Tnfp3       | 806               | 818               | 685               | 26                | 27                | 16                | 28          | 20          | 26          | 23      | 24      | 25      | 28                  | 29                  | 24                  | 5.6155E-15 | 31.29 |
| 10407435    | Akr1c18     | 444               | 511               | 426               | 24                | 24                | 39                | 19          | 17          | 16          | 18      | 15      | 15      | 19                  | 18                  | 18                  | 1.7068E-14 | 22.98 |
| 10377774    | Mgl2        | 1340              | 1731              | 951               | 118               | 213               | 161               | 20          | 16          | 22          | 26      | 19      | 22      | 62                  | 38                  | 35                  | 2.0145E-08 | 21.39 |
| 10586865    | Aldh1a2     | 1994              | 1878              | 1753              | 248               | 328               | 337               | 26          | 23          | 22          | 32      | 31      | 34      | 30                  | 25                  | 30                  | 1.2028E-11 | 19.29 |
| 10436095    | Retnla      | 5540              | 5906              | 5490              | 1974              | 1554              | 1661              | 48          | 19          | 14          | 15      | 13      | 13      | 22                  | 18                  | 19                  | 4.998E-08  | 12.62 |
| 10444298    | H2-Eb1      | 8697              | 8697              | 8966              | 131               | 105               | 97                | 1822        | 2234        | 2197        | 147     | 169     | 209     | 649                 | 371                 | 457                 | 6.2116E-10 | 12.28 |
| 10493820    | S100a6      | 2343              | 2480              | 2465              | 602               | 618               | 732               | 42          | 31          | 38          | 63      | 103     | 65      | 53                  | 37                  | 43                  | 4.3424E-09 | 12.00 |
| 10548415    | Klri1       | 235               | 208               | 159               | 15                | 20                | 17                | 14          | 15          | 24          | 15      | 16      | 16      | 21                  | 17                  | 17                  | 1.036E-10  | 11.55 |
| 10447056    | Qpct        | 574               | 737               | 457               | 102               | 132               | 112               | 34          | 31          | 32          | 43      | 52      | 43      | 40                  | 37                  | 34                  | 9.4445E-09 | 10.22 |
| 10460118    | Socs6       | 2242              | 1898              | 2218              | 246               | 266               | 260               | 103         | 312         | 228         | 199     | 217     | 203     | 76                  | 205                 | 256                 | 1.9137E-13 | 9.89  |
| 10547100    | Plxnd1      | 2262              | 1945              | 2020              | 113               | 103               | 123               | 141         | 123         | 136         | 563     | 552     | 490     | 97                  | 77                  | 58                  | 1.2815E-09 | 9.67  |
| 10530827    | Spink2      | 378               | 405               | 284               | 43                | 42                | 37                | 38          | 34          | 40          | 29      | 30      | 29      | 40                  | 41                  | 49                  | 6.1104E-11 | 9.44  |
| 10400143    | Stxbp6      | 508               | 412               | 312               | 65                | 43                | 40                | 50          | 36          | 51          | 46      | 38      | 39      | 44                  | 51                  | 49                  | 2.1403E-09 | 8.94  |
| 10444291    | H2-Ab1      | 9779              | 9521              | 9908              | 175               | 151               | 161               | 3277        | 3535        | 3138        | 235     | 338     | 356     | 958                 | 388                 | 461                 | 8.2134E-08 | 8.87  |
| 10450154    | H2-Aa       | 10960             | 10657             | 10739             | 103               | 81                | 102               | 3567        | 4755        | 4252        | 208     | 414     | 434     | 889                 | 494                 | 545                 | 5.8215E-07 | 8.17  |
| 10444236    | H2-DMb2     | 3198              | 3176              | 2786              | 201               | 185               | 246               | 426         | 522         | 497         | 368     | 528     | 498     | 444                 | 245                 | 358                 | 5.8045E-13 | 8.11  |
| 10519983    | Fgl2        | 706               | 596               | 944               | 78                | 75                | 67                | 113         | 236         | 170         | 43      | 38      | 50      | 56                  | 98                  | 87                  | 3.1925E-08 | 8.08  |
| 10550877    | Kcnn4       | 1087              | 964               | 1051              | 105               | 106               | 117               | 153         | 183         | 152         | 89      | 86      | 78      | 209                 | 107                 | 165                 | 1.8404E-13 | 8.01  |
| 10493812    | S100a4      | 1206              | 1289              | 1168              | 444               | 404               | 514               | 69          | 43          | 56          | 49      | 59      | 47      | 46                  | 60                  | 256                 | 2.5154E-07 | 7.97  |
| 10478633    | Mmp9        | 696               | 719               | 555               | 151               | 128               | 192               | 54          | 53          | 56          | 61      | 50      | 56      | 74                  | 53                  | 68                  | 6.472E-10  | 7.90  |
| 10407327    | Emb         | 1857              | 2075              | 1672              | 210               | 258               | 260               | 16          | 13          | 31          | 619     | 724     | 616     | 43                  | 21                  | 27                  | 2.5184E-07 | 7.90  |
| 10360173    | Slamf7      | 234               | 204               | 256               | 24                | 27                | 24                | 30          | 33          | 36          | 20      | 23      | 21      | 47                  | 39                  | 39                  | 6.4095E-12 | 7.49  |
| 10502156    | Ccdc109b    | 1487              | 1557              | 1489              | 386               | 412               | 458               | 85          | 116         | 134         | 192     | 379     | 248     | 49                  | 34                  | 53                  | 4.0438E-09 | 7.12  |
| 10404389    | Irf4        | 734               | 664               | 617               | 170               | 193               | 207               | 56          | 87          | 62          | 43      | 47      | 42      | 63                  | 82                  | 81                  | 1.4657E-09 | 7.11  |
| 10415392    | Ltb4r1      | 259               | 302               | 187               | 36                | 30                | 29                | 40          | 36          | 37          | 33      | 37      | 37      | 39                  | 39                  | 33                  | 2.4224E-09 | 7.01  |
| 10483046    | Dpp4        | 589               | 538               | 414               | 29                | 28                | 32                | 94          | 169         | 254         | 42      | 39      | 50      | 56                  | 57                  | 57                  | 3.7221E-07 | 6.79  |
| 10364593    | Cnn2        | 1699              | 1613              | 1459              | 338               | 383               | 426               | 147         | 332         | 331         | 155     | 176     | 167     | 164                 | 94                  | 148                 | 1.2358E-10 | 6.67  |
| 10422822    | Lifr        | 2321              | 1694              | 1691              | 657               | 532               | 542               | 85          | 140         | 85          | 33      | 30      | 26      | 229                 | 760                 | 353                 | 8.2043E-07 | 6.57  |
| 10433507    | Ciita       | 757               | 761               | 804               | 54                | 55                | 56                | 311         | 246         | 238         | 80      | 82      | 76      | 89                  | 97                  | 98                  | 1.5088E-08 | 6.27  |
| 10551666    | Map4k1      | 1174              | 944               | 984               | 104               | 82                | 108               | 66          | 76          | 70          | 411     | 416     | 388     | 107                 | 88                  | 98                  | 3.1492E-07 | 6.17  |
| 10542917    | Hepacam2    | 202               | 189               | 199               | 29                | 28                | 34                | 26          | 24          | 25          | 36      | 34      | 41      | 42                  | 32                  | 39                  | 4.7722E-15 | 6.05  |
| 10399005    | Crip1       | 5988              | 6203              | 5999              | 2711              | 2526              | 2969              | 541         | 723         | 707         | 452     | 458     | 448     | 223                 | 120                 | 142                 | 2.297E-06  | 6.05  |
| 10576807    | Cd209d      | 168               | 138               | 121               | 25                | 26                | 24                | 21          | 22          | 27          | 22      | 21      | 17      | 25                  | 34                  | 22                  | 1.2093E-10 | 5.98  |
| 10585555    | Pstpip1     | 620               | 695               | 576               | 135               | 152               | 162               | 105         | 66          | 98          | 78      | 74      | 67      | 137                 | 107                 | 88                  | 2.0183E-11 | 5.96  |
| 10548905    | Eps8        | 1920              | 1551              | 1583              | 484               | 676               | 596               | 81          | 57          | 58          | 363     | 391     | 337     | 128                 | 135                 | 130                 | 1.7793E-07 | 5.89  |
| 10606355    | Cysltr1     | 2047              | 1827              | 1824              | 593               | 721               | 594               | 30          | 44          | 49          | 84      | 112     | 106     | 112                 | 521                 | 921                 | 1.836E-06  | 5.86  |
| 10370552    | Ppap2c      | 936               | 879               | 937               | 159               | 171               | 188               | 83          | 127         | 118         | 128     | 138     | 116     | 309                 | 184                 | 182                 | 1.4803E-11 | 5.78  |
| 10489569    | Pltp        | 11488             | 10118             | 10241             | 4467              | 4121              | 4912              | 675         | 725         | 726         | 1871    | 2049    | 2015    | 400                 | 253                 | 193                 | 1.3182E-06 | 5.69  |
| 10576829    | Cd209c      | 281               | 247               | 190               | 39                | 51                | 35                | 41          | 31          | 44          | 41      | 38      | 43      | 57                  | 44                  | 43                  | 6.6517E-10 | 5.65  |
| 10402800    | Gpr132      | 398               | 550               | 447               | 102               | 93                | 84                | 71          | 57          | 117         | 65      | 73      | 79      | 102                 | 88                  | 91                  | 2.5487E-10 | 5.47  |
| 10412078    | Gap2        | 907               | 751               | 835               | 236               | 227               | 256               | 78          | 53          | 56          | 238     | 285     | 208     | 50                  | 76                  | 65                  | 4.1825E-08 | 5.45  |
| 10538150    | Tmem176a    | 2300              | 2243              | 2165              | 673               | 647               | 855               | 61          | 66          | 85          | 76      | 54      | 61      | 1105                | 489                 | 755                 | 2.4271E-06 | 5.44  |
| 10481164    | Slc2a6      | 1222              | 1493              | 1712              | 584               | 713               | 647               | 129         | 90          | 118         | 139     | 147     | 146     | 221                 | 157                 | 166                 | 2.223E-06  | 5.44  |
| 10394471    | Sdc1        | 383               | 360               | 270               | 67                | 51                | 47                | 86          | 43          | 55          | 60      | 56      | 57      | 78                  | 78                  | 77                  | 6.2303E-10 | 5.38  |
| 10524234    | Galnt9      | 499               | 544               | 478               | 158               | 151               | 194               | 66          | 54          | 66          | 62      | 56      | 63      | 108                 | 86                  | 83                  | 2.9022E-09 | 5.32  |
| 10345791    | Il1rl1      | 247               | 253               | 182               | 56                | 58                | 61                | 29          | 27          | 30          | 23      | 23      | 25      | 42                  | 79                  | 65                  | 2.0711E-08 | 5.26  |
| 10508734    | Ptafr       | 2034              | 1998              | 2043              | 405               | 520               | 588               | 124         | 179         | 170         | 79      | 86      | 83      | 846                 | 678                 | 871                 | 5.7331E-07 | 5.25  |
| 10536931    | Ahcy12      | 1958              | 2111              | 1821              | 570               | 625               | 710               | 295         | 436         | 369         | 313     | 451     | 368     | 91                  | 176                 | 138                 | 6.7678E-09 | 5.19  |

|                  |             |             |             |      |      |      |      |      |      |      |      |      |      |      |      |                   |             |
|------------------|-------------|-------------|-------------|------|------|------|------|------|------|------|------|------|------|------|------|-------------------|-------------|
| 10492330 P2ry1   | <b>435</b>  | <b>453</b>  | <b>345</b>  | 134  | 151  | 239  | 49   | 39   | 49   | 48   | 47   | 47   | 66   | 61   | 49   | <b>1.3289E-06</b> | <b>5.04</b> |
| 10521913 Rbpj    | <b>2326</b> | <b>2280</b> | <b>2170</b> | 889  | 921  | 999  | 212  | 336  | 303  | 295  | 315  | 319  | 135  | 435  | 262  | <b>1.7558E-07</b> | <b>5.00</b> |
| 10470529 Olfm1   | <b>528</b>  | <b>540</b>  | <b>511</b>  | 82   | 82   | 86   | 98   | 74   | 74   | 181  | 164  | 144  | 115  | 79   | 105  | <b>7.8211E-11</b> | <b>4.92</b> |
| 10458589 Prelid2 | <b>184</b>  | <b>194</b>  | <b>148</b>  | 37   | 42   | 33   | 21   | 33   | 29   | 39   | 50   | 45   | 43   | 27   | 42   | <b>2.056E-10</b>  | <b>4.77</b> |
| 10354111 Aff3    | <b>318</b>  | <b>280</b>  | <b>252</b>  | 51   | 58   | 77   | 58   | 45   | 44   | 61   | 49   | 43   | 83   | 71   | 78   | <b>8.8071E-11</b> | <b>4.73</b> |
| 10355050 Raph1   | <b>476</b>  | <b>580</b>  | <b>488</b>  | 169  | 190  | 131  | 126  | 121  | 112  | 107  | 88   | 104  | 47   | 62   | 54   | <b>3.9061E-09</b> | <b>4.70</b> |
| 10489705 Slc13a3 | <b>542</b>  | <b>610</b>  | <b>407</b>  | 100  | 78   | 115  | 102  | 115  | 126  | 62   | 53   | 50   | 263  | 143  | 135  | <b>3.1452E-07</b> | <b>4.65</b> |
| 10552697 Napsa   | <b>917</b>  | <b>912</b>  | <b>844</b>  | 174  | 142  | 184  | 133  | 161  | 216  | 357  | 339  | 307  | 129  | 90   | 95   | <b>1.2735E-08</b> | <b>4.60</b> |
| 10356172 Pid1    | <b>1868</b> | <b>1562</b> | <b>1838</b> | 664  | 724  | 577  | 443  | 467  | 426  | 224  | 252  | 227  | 134  | 266  | 210  | <b>5.1884E-08</b> | <b>4.57</b> |
| 10453260 Haa0    | <b>695</b>  | <b>722</b>  | <b>585</b>  | 148  | 168  | 147  | 94   | 97   | 119  | 141  | 121  | 121  | 237  | 181  | 238  | <b>1.144E-09</b>  | <b>4.42</b> |
| 10416302 Hr      | <b>477</b>  | <b>348</b>  | <b>332</b>  | 58   | 65   | 52   | 84   | 62   | 78   | 166  | 149  | 153  | 84   | 90   | 78   | <b>3.6174E-07</b> | <b>4.13</b> |
| 10416334 Dok2    | <b>1186</b> | <b>1141</b> | <b>1118</b> | 486  | 418  | 468  | 207  | 173  | 226  | 251  | 298  | 270  | 217  | 172  | 152  | <b>1.3365E-08</b> | <b>4.13</b> |
| 10361807 Hivep2  | <b>477</b>  | <b>522</b>  | <b>340</b>  | 204  | 183  | 176  | 71   | 168  | 94   | 72   | 101  | 99   | 34   | 64   | 40   | <b>2.3522E-06</b> | <b>4.10</b> |
| 10481949 Traf1   | <b>210</b>  | <b>189</b>  | <b>199</b>  | 46   | 51   | 45   | 55   | 40   | 62   | 43   | 34   | 47   | 60   | 41   | 66   | <b>4.8419E-12</b> | <b>4.05</b> |
| 10517165 Cd52    | <b>3595</b> | <b>3550</b> | <b>3408</b> | 1129 | 911  | 1092 | 664  | 936  | 896  | 902  | 1346 | 1025 | 832  | 297  | 714  | <b>4.0461E-10</b> | <b>3.93</b> |
| 10495659 Cnn3    | <b>193</b>  | <b>212</b>  | <b>338</b>  | 52   | 53   | 63   | 76   | 60   | 73   | 53   | 46   | 42   | 89   | 55   | 95   | <b>1.5564E-06</b> | <b>3.92</b> |
| 10530819 Hopx    | <b>226</b>  | <b>283</b>  | <b>295</b>  | 126  | 138  | 92   | 47   | 42   | 51   | 76   | 76   | 57   | 52   | 39   | 55   | <b>4.7923E-07</b> | <b>3.77</b> |
| 10530045 Sepsecs | <b>668</b>  | <b>557</b>  | <b>630</b>  | 240  | 243  | 257  | 179  | 195  | 167  | 125  | 135  | 143  | 97   | 116  | 102  | <b>1.4505E-08</b> | <b>3.71</b> |
| 10364038 Upb1    | <b>179</b>  | <b>196</b>  | <b>186</b>  | 39   | 42   | 56   | 48   | 44   | 46   | 46   | 44   | 35   | 86   | 44   | 76   | <b>1.6782E-09</b> | <b>3.70</b> |
| 10428579 Ext1    | <b>1234</b> | <b>1287</b> | <b>1145</b> | 423  | 447  | 457  | 235  | 387  | 270  | 341  | 395  | 461  | 128  | 235  | 199  | <b>1.0308E-08</b> | <b>3.69</b> |
| 10444229 H2-DMa  | <b>1920</b> | <b>1971</b> | <b>1715</b> | 279  | 238  | 348  | 362  | 483  | 400  | 816  | 1020 | 750  | 842  | 272  | 402  | <b>1.3701E-06</b> | <b>3.61</b> |
| 10408610 Tubb2a  | <b>694</b>  | <b>633</b>  | <b>690</b>  | 224  | 214  | 228  | 112  | 448  | 155  | 103  | 116  | 109  | 291  | 196  | 153  | <b>2.2037E-06</b> | <b>3.44</b> |
| 10564631 Slco3a1 | <b>388</b>  | <b>341</b>  | <b>476</b>  | 115  | 119  | 118  | 118  | 101  | 115  | 125  | 106  | 110  | 129  | 141  | 113  | <b>1.0014E-09</b> | <b>3.41</b> |
| 10462113 Appb1   | <b>352</b>  | <b>417</b>  | <b>362</b>  | 112  | 100  | 97   | 74   | 59   | 69   | 138  | 128  | 143  | 159  | 155  | 119  | <b>1.901E-08</b>  | <b>3.34</b> |
| 10499666 Atp8b2  | <b>469</b>  | <b>404</b>  | <b>418</b>  | 107  | 99   | 109  | 137  | 161  | 127  | 98   | 84   | 95   | 264  | 183  | 158  | <b>3.9003E-07</b> | <b>3.18</b> |
| 10376832 Adora2b | <b>248</b>  | <b>235</b>  | <b>230</b>  | 125  | 101  | 124  | 57   | 65   | 52   | 65   | 64   | 67   | 66   | 50   | 59   | <b>1.4131E-07</b> | <b>3.18</b> |
| 10604057 Sept6   | <b>334</b>  | <b>329</b>  | <b>279</b>  | 118  | 88   | 130  | 61   | 53   | 76   | 132  | 109  | 110  | 116  | 117  | 95   | <b>1.4268E-08</b> | <b>3.12</b> |
| 10574246 Gpr114  | <b>190</b>  | <b>166</b>  | <b>168</b>  | 58   | 49   | 50   | 59   | 44   | 56   | 54   | 56   | 54   | 74   | 67   | 65   | <b>4.553E-11</b>  | <b>3.06</b> |
| 10555186 Wnt11   | <b>200</b>  | <b>282</b>  | <b>212</b>  | 55   | 60   | 63   | 92   | 55   | 66   | 76   | 69   | 66   | 100  | 101  | 105  | <b>2.2006E-07</b> | <b>3.05</b> |
| 10430255 Foxred2 | <b>247</b>  | <b>245</b>  | <b>217</b>  | 101  | 79   | 105  | 70   | 47   | 46   | 91   | 87   | 77   | 78   | 75   | 75   | <b>3.9988E-09</b> | <b>3.05</b> |
| 10552469 Klk13   | <b>209</b>  | <b>180</b>  | <b>124</b>  | 48   | 48   | 52   | 58   | 51   | 55   | 59   | 54   | 52   | 71   | 57   | 73   | <b>3.0983E-07</b> | <b>3.03</b> |
| 10352448 Dusp10  | <b>201</b>  | <b>295</b>  | <b>237</b>  | 54   | 51   | 58   | 92   | 148  | 73   | 68   | 84   | 64   | 106  | 106  | 66   | <b>2.4653E-06</b> | <b>3.02</b> |
| 10501676 Hiat1   | <b>1926</b> | <b>1935</b> | <b>1808</b> | 945  | 1005 | 961  | 386  | 780  | 590  | 542  | 587  | 627  | 276  | 425  | 531  | <b>7.6104E-07</b> | <b>2.96</b> |
| 10376208 Gm2a    | <b>5130</b> | <b>4900</b> | <b>4687</b> | 1608 | 1541 | 1523 | 1470 | 1970 | 2012 | 1807 | 1904 | 1601 | 1924 | 1199 | 1444 | <b>3.3879E-11</b> | <b>2.94</b> |
| 10396421 Hif1a   | <b>1754</b> | <b>1539</b> | <b>1510</b> | 549  | 547  | 561  | 359  | 834  | 614  | 561  | 604  | 674  | 131  | 597  | 591  | <b>2.1922E-07</b> | <b>2.90</b> |
| 10364030 Adora2a | <b>234</b>  | <b>269</b>  | <b>238</b>  | 74   | 81   | 82   | 130  | 46   | 91   | 74   | 62   | 62   | 138  | 91   | 92   | <b>2.3601E-07</b> | <b>2.90</b> |
| 10574204 Arl2bp  | <b>967</b>  | <b>1073</b> | <b>758</b>  | 422  | 479  | 404  | 206  | 324  | 247  | 293  | 269  | 290  | 358  | 284  | 332  | <b>2.2111E-07</b> | <b>2.86</b> |
| 10481304 Gfi1b   | <b>351</b>  | <b>401</b>  | <b>398</b>  | 190  | 162  | 243  | 140  | 108  | 110  | 100  | 87   | 89   | 202  | 142  | 130  | <b>2.0993E-06</b> | <b>2.70</b> |
| 10499766 Slc27a3 | <b>200</b>  | <b>164</b>  | <b>167</b>  | 42   | 57   | 67   | 90   | 58   | 73   | 56   | 45   | 49   | 111  | 66   | 75   | <b>8.9215E-07</b> | <b>2.69</b> |
| 10545672 Mthfd2  | <b>301</b>  | <b>331</b>  | <b>342</b>  | 102  | 97   | 127  | 72   | 66   | 68   | 169  | 182  | 160  | 154  | 114  | 151  | <b>1.9562E-06</b> | <b>2.67</b> |
| 10510687 Acot7   | <b>455</b>  | <b>412</b>  | <b>430</b>  | 116  | 135  | 121  | 165  | 145  | 147  | 171  | 217  | 183  | 253  | 147  | 165  | <b>4.9138E-08</b> | <b>2.64</b> |
| 10547830 Tpi1    | <b>1921</b> | <b>2033</b> | <b>2102</b> | 931  | 1027 | 971  | 389  | 563  | 520  | 682  | 863  | 662  | 1255 | 550  | 867  | <b>1.7032E-06</b> | <b>2.61</b> |
| 10517883 Necap2  | <b>2505</b> | <b>2387</b> | <b>2188</b> | 1142 | 1171 | 1218 | 484  | 580  | 667  | 807  | 860  | 755  | 1390 | 1078 | 1020 | <b>1.455E-06</b>  | <b>2.53</b> |
| 10357590 Dyrk3   | <b>271</b>  | <b>200</b>  | <b>190</b>  | 113  | 106  | 99   | 61   | 81   | 74   | 78   | 80   | 79   | 100  | 79   | 96   | <b>4.4169E-07</b> | <b>2.53</b> |
| 10578515 Ankrd37 | <b>164</b>  | <b>222</b>  | <b>163</b>  | 80   | 96   | 76   | 88   | 61   | 74   | 53   | 52   | 56   | 86   | 81   | 74   | <b>5.2549E-07</b> | <b>2.50</b> |
| 10489660 Elmo2   | <b>1239</b> | <b>1292</b> | <b>1139</b> | 625  | 548  | 614  | 416  | 467  | 453  | 654  | 600  | 582  | 360  | 333  | 283  | <b>3.741E-07</b>  | <b>2.47</b> |
| 10406736 F2rl2   | <b>122</b>  | <b>141</b>  | <b>118</b>  | 36   | 41   | 38   | 84   | 54   | 65   | 60   | 51   | 52   | 71   | 65   | 53   | <b>2.278E-06</b>  | <b>2.27</b> |
| 10457118 Rtnn    | <b>230</b>  | <b>255</b>  | <b>206</b>  | 83   | 110  | 119  | 125  | 146  | 137  | 90   | 89   | 94   | 70   | 98   | 68   | <b>2.62E-06</b>   | <b>2.25</b> |
| 10440206 Arl6    | <b>148</b>  | <b>165</b>  | <b>144</b>  | 67   | 79   | 89   | 67   | 46   | 65   | 68   | 78   | 71   | 50   | 67   | 73   | <b>4.2338E-08</b> | <b>2.23</b> |
| 10361152 Gstp2   | <b>360</b>  | <b>380</b>  | <b>376</b>  | 167  | 153  | 189  | 189  | 203  | 212  | 189  | 203  | 178  | 181  | 100  | 101  | <b>5.6794E-07</b> | <b>2.16</b> |
| 10529402 Tnip2   | <b>423</b>  | <b>346</b>  | <b>386</b>  | 225  | 247  | 196  | 153  | 128  | 150  | 176  | 180  | 200  | 110  | 198  | 193  | <b>1.911E-06</b>  | <b>2.14</b> |
| 10409557 H2afy   | <b>1196</b> | <b>1165</b> | <b>1085</b> | 525  | 558  | 586  | 344  | 490  | 513  | 681  | 700  | 650  | 443  | 519  | 607  | <b>2.9699E-07</b> | <b>2.08</b> |
| 10584615 Pvrl1   | <b>158</b>  | <b>148</b>  | <b>156</b>  | 77   | 67   | 95   | 66   | 53   | 68   | 68   | 67   | 66   | 101  | 78   | 90   | <b>3.6178E-07</b> | <b>2.07</b> |
| 10398936 Pacs2   | <b>858</b>  | <b>704</b>  | <b>707</b>  | 383  | 336  | 360  | 346  | 310  | 353  | 364  | 319  | 321  | 410  | 575  | 372  | <b>1.838E-06</b>  | <b>2.04</b> |

|                   |             |             |             |      |      |      |      |      |      |      |      |      |      |      |      |                   |             |
|-------------------|-------------|-------------|-------------|------|------|------|------|------|------|------|------|------|------|------|------|-------------------|-------------|
| 10367641 Mthfd1l  | <b>251</b>  | <b>282</b>  | <b>252</b>  | 167  | 175  | 152  | 115  | 137  | 115  | 113  | 102  | 101  | 138  | 150  | 146  | <b>1.483E-06</b>  | <b>1.95</b> |
| 10569733 Arhgef18 | <b>462</b>  | <b>434</b>  | <b>380</b>  | 265  | 223  | 256  | 213  | 227  | 189  | 220  | 200  | 188  | 255  | 221  | 175  | <b>1.3166E-07</b> | <b>1.94</b> |
| 10365136 Aes      | <b>892</b>  | <b>926</b>  | <b>841</b>  | 440  | 449  | 582  | 342  | 421  | 418  | 547  | 529  | 429  | 587  | 320  | 458  | <b>1.8048E-06</b> | <b>1.93</b> |
| 10489912 Tmem189  | <b>2412</b> | <b>2384</b> | <b>2272</b> | 1221 | 1291 | 1519 | 975  | 1092 | 864  | 1515 | 1388 | 1425 | 1350 | 1102 | 1057 | <b>8.9898E-07</b> | <b>1.91</b> |
| 10569024 Sigirr   | <b>189</b>  | <b>199</b>  | <b>167</b>  | 96   | 97   | 91   | 103  | 88   | 79   | 88   | 85   | 104  | 141  | 98   | 113  | <b>1.6913E-06</b> | <b>1.88</b> |
| 10596442 Ppm1m    | <b>690</b>  | <b>611</b>  | <b>626</b>  | 338  | 428  | 361  | 298  | 260  | 312  | 299  | 318  | 324  | 480  | 327  | 377  | <b>2.4758E-06</b> | <b>1.87</b> |
| 10418410 Prkcd    | <b>2633</b> | <b>2258</b> | <b>2360</b> | 1349 | 1312 | 1368 | 1039 | 1023 | 1124 | 1284 | 1339 | 1450 | 1184 | 1786 | 1445 | <b>1.4328E-06</b> | <b>1.85</b> |
| 10450579 Ddr1     | <b>124</b>  | <b>129</b>  | <b>122</b>  | 76   | 64   | 61   | 72   | 50   | 61   | 75   | 75   | 68   | 90   | 68   | 78   | <b>5.3964E-07</b> | <b>1.79</b> |
